# Supplementary material for: Dynamic properties of the growth hormone releasing hormone receptor (GHRHR) and molecular determinants of GHRH binding
Source: Royal Society of Chemistry journal article supplement (doi:10.1039/c7mb00130d), 2017-05-19
Supplement: c7mb00130d2.pdf [file c7mb00130d2.pdf]

**Dynamic properties of the Growth Hormone Releasing Hormone Receptor (GHRHR) and  
molecular determinants of GHRH binding**

M.-T. Matsoukas\* and G. A. Spyroulias

University of Patras, School of Health Sciences, Department of Pharmacy, University Campus, Rion,  
Patras, Greece.

\*: To whom correspondence should be addressed at:

University of Patras, School of Health Sciences, Department of Pharmacy, University Campus, Rion,  
GR-265 04, Patras, Greece; Telephone: +30-2610-962351, Fax: +30-2610-997693, Email:

[minosmatsoukas@upatras.gr](mailto:minosmatsoukas@upatras.gr)

### Supplementary information

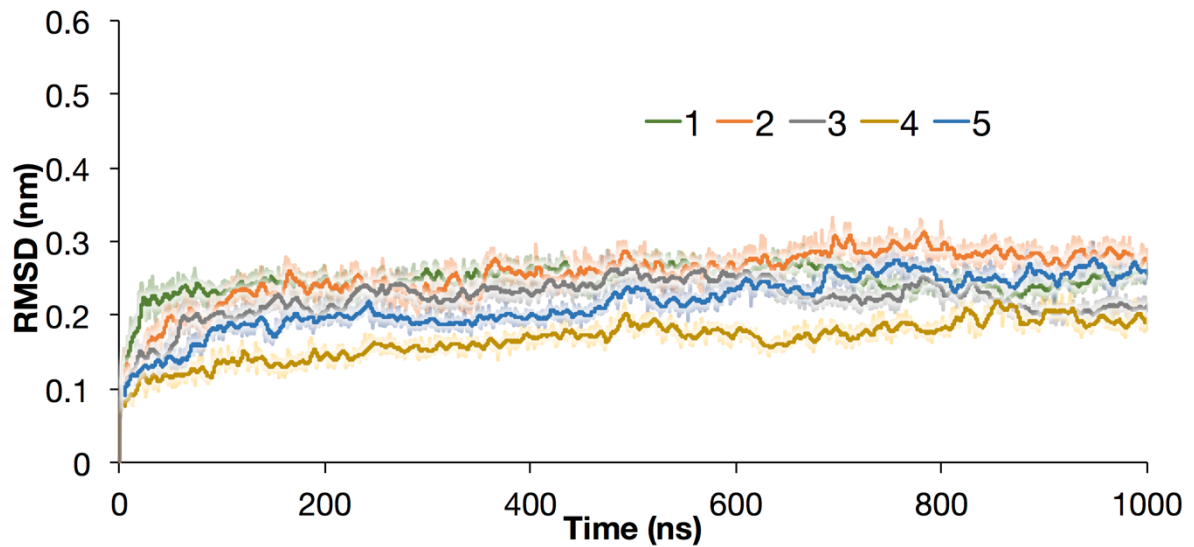

**Figure S1.** Root-mean squared deviation of the GHRHR 7TM C $_{\alpha}$  atoms for the five independent apo GHRHR simulations.

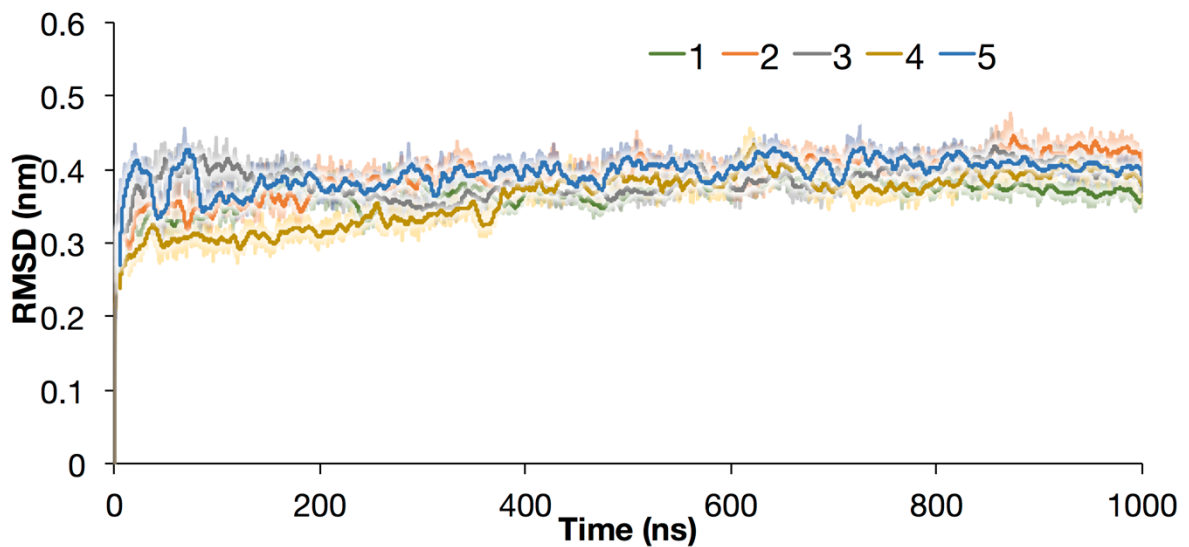

**Figure S2.** Root-mean squared deviation of the GHRHR 7TM C $_{\alpha}$  atoms for the five independent GHRHR-modGHRH simulations.

**Video S3.** Trajectory of a 1 $\mu$ s simulation of the modGHRH-GHRHR complex in surface representation. modGHRH is shown in orange, the TMD of GHRHR in white and the ECD in blue colors.
